# Supplementary material
Source: PubMed Central journal article supplement (PMC6347461)
Supplement: NIHMS1003302-supplement-SI.pdf [file NIHMS1003302-supplement-SI.pdf]

1 **Supporting Information**

2

3 **Treatment of Perfluoroalkyl Acids by Heat-Activated Persulfate Under**

4 **Conditions Representative of In Situ Chemical Oxidation**

5

6

7

8 Thomas A. Bruton<sup>†</sup> and David L. Sedlak<sup>†\*</sup>

9 <sup>†</sup> Dept. of Civil and Environmental Engineering, University of California at Berkeley,

10 Berkeley, CA 94720 USA

11

12

13 \* Corresponding author, e-mail: [sedlak@berkeley.edu](mailto:sedlak@berkeley.edu), phone (510) 643-0256

14

15

16

17 *Submitted to Chemosphere*

18

19

## 1 **Table of Contents**

2 **Table S1:** Full names, abbreviations, and molecular formulae for PFAA analytes  
3 measured in this study.

4

5 **Table S2:** Physico-chemical properties of aquifer sediment.

6

7 **Table S3:** Internal standard, monitored ion transitions, and MS conditions used for  
8 quantification of each analyte.

9

10 **Figure S1:** Persulfate decomposition kinetics.

11

12 **Figure S2:** PFOA removal kinetics in unbuffered water with  $\text{pH}_0 = 1.0, 2.0, \text{ or } 3.2$ .

13

14 **Figure S3:** Analysis of  $\text{SO}_4^-$  fate in reaction systems with different pH.

15

16 **Figure S4:** Heat-activated persulfate treatment of PFOS in water.

17

18 **Figure S5:** Effect of initial  $\text{Cl}^-$  concentration on observed pseudo-first order rate  
19 constants for PFOA loss.

20

21 **Figure S6:** Loss of  $\text{Cl}^-$  and production of  $\text{ClO}_3^-$  during heat-activated persulfate treatment  
22 of PFOA in aquifer sediment slurry.

23

24 **Figure S7:** Total organic carbon concentration during heat-activated persulfate treatment  
25 of PFOA in aquifer sediment slurry.

26

27 **Figure S8:** Heat-activated persulfate treatment of PFOA in surficial soil slurry.

28

| Name                       | Abbreviation | Molecular Formula |
|----------------------------|--------------|-------------------|
| Perfluorocarboxylates      |              |                   |
| Perfluorobutyrate          | PFBA         | $C_3F_7COO^-$     |
| Perfluoropentanoate        | PFPeA        | $C_4F_9COO^-$     |
| Perfluorohexanoate         | PFHxA        | $C_5F_{11}COO^-$  |
| Perfluoroheptanoate        | PFHpA        | $C_6F_{13}COO^-$  |
| Perfluorooctanoate         | PFOA         | $C_7F_{15}COO^-$  |
| Perfluorosulfonates        |              |                   |
| Perfluorobutane sulfonate  | PFBS         | $C_4F_9SO_3^-$    |
| Perfluorohexane sulfonate  | PFHxS        | $C_6F_{13}SO_3^-$ |
| Perfluoroheptane sulfonate | PFHpS        | $C_7F_{15}SO_3^-$ |
| Perfluorooctane sulfonate  | PFOS         | $C_8F_{17}SO_3^-$ |

1

2 **Table S1.** Full names, abbreviations, and molecular formulae for PFAA analytes

3 measured in this study.

4

| Sand<br>(wt. %) | Silt<br>(wt. %) | Clay<br>(wt. %) | pH  | BET<br>surface<br>area<br>(m <sup>2</sup> /g) | Total Fe<br>(mg/kg) | Total<br>Mn<br>(mg/kg) | Fe-CBD<br>(mg/kg) | Mn-<br>CBD<br>(mg/kg) | TC<br>(%) |
|-----------------|-----------------|-----------------|-----|-----------------------------------------------|---------------------|------------------------|-------------------|-----------------------|-----------|
| 82              | 10              | 8               | 7.8 | 14.3                                          | 16,700              | 287                    | 8,010             | 191                   | 0.03      |

1

2

**Table S2.** Physico-chemical properties of aquifer sediment. Surface area was

3

measured at the University of California, Berkeley. All other properties were

4

determined by the Analytical Laboratory at the University of California, Davis.

5

Details on the analytical protocols are available at <http://anlab.ucdavis.edu/methods->

6

[of-analysis](http://anlab.ucdavis.edu/methods-) . Fe-CBD and Mn-CBD are the concentrations of Fe and Mn remaining in

7

the sediments after treatment with a citrate-bicarbonate-dithionite extraction as

8

described previously<sup>1</sup>. The CBD extraction procedure is designed to remove free Fe

9

and Mn oxides, leaving only structural Fe and Mn.

10

| Compound                               | Internal Standard                      | Molecular Ion | Fragmentor Voltage (V) | Quant. Ion (m/z) | Collision Energy (V) | Qual. Ion (m/z) | Collision Energy (V) | Polarity |
|----------------------------------------|----------------------------------------|---------------|------------------------|------------------|----------------------|-----------------|----------------------|----------|
| Perfluorocarboxylates                  |                                        |               |                        |                  |                      |                 |                      |          |
| PFBA                                   | [ <sup>13</sup> C <sub>4</sub> ] PFBA  | 213           | 50                     | 169              | 2                    |                 |                      | (-)      |
| PFPeA                                  | [ <sup>13</sup> C <sub>3</sub> ] PFPeA | 263           | 60                     | 219              | 2                    |                 |                      | (-)      |
| PFHxA                                  | [ <sup>13</sup> C <sub>2</sub> ] PFHxA | 313           | 80                     | 269              | 2                    | 119             | 15                   | (-)      |
| PFHpA                                  | [ <sup>13</sup> C <sub>2</sub> ] PFHxA | 363           | 80                     | 319              | 2                    | 169             | 2                    | (-)      |
| PFOA                                   | [ <sup>13</sup> C <sub>4</sub> ] PFOA  | 413           | 80                     | 369              | 3                    | 169             | 14                   | (-)      |
| Perfluorosulfonates                    |                                        |               |                        |                  |                      |                 |                      |          |
| PFBS                                   | [ <sup>18</sup> O <sub>2</sub> ] PFHxS | 299           | 120                    | 80               | 70                   | 99              | 30                   | (-)      |
| PFHxS                                  | [ <sup>18</sup> O <sub>2</sub> ] PFHxS | 399           | 160                    | 80               | 80                   | 99              | 50                   | (-)      |
| PFHpS                                  | [ <sup>13</sup> C <sub>4</sub> ] PFOS  | 449           | 160                    | 80               | 80                   | 99              | 50                   | (-)      |
| PFOS                                   | [ <sup>13</sup> C <sub>4</sub> ] PFOS  | 499           | 180                    | 80               | 80                   | 99              | 50                   | (-)      |
| Internal Standards                     |                                        |               |                        |                  |                      |                 |                      |          |
| [ <sup>13</sup> C <sub>4</sub> ] PFBA  |                                        | 217           | 50                     | 172              | 5                    |                 |                      | (-)      |
| [ <sup>13</sup> C <sub>3</sub> ] PFPeA |                                        | 266           | 60                     | 222              | 2                    |                 |                      | (-)      |
| [ <sup>13</sup> C <sub>2</sub> ] PFHxA |                                        | 315           | 60                     | 270              | 5                    |                 |                      | (-)      |
| [ <sup>13</sup> C <sub>4</sub> ] PFOA  |                                        | 417           | 70                     | 372              | 2                    |                 |                      | (-)      |
| [ <sup>18</sup> O <sub>2</sub> ] PFHxS |                                        | 403           | 150                    | 103              | 40                   |                 |                      | (-)      |
| [ <sup>13</sup> C <sub>4</sub> ] PFOS  |                                        | 503           | 190                    | 80               | 60                   |                 |                      | (-)      |

1

2 **Table S3.** Internal standard, monitored ion transitions, and MS conditions used for  
3 quantification of each analyte.

4

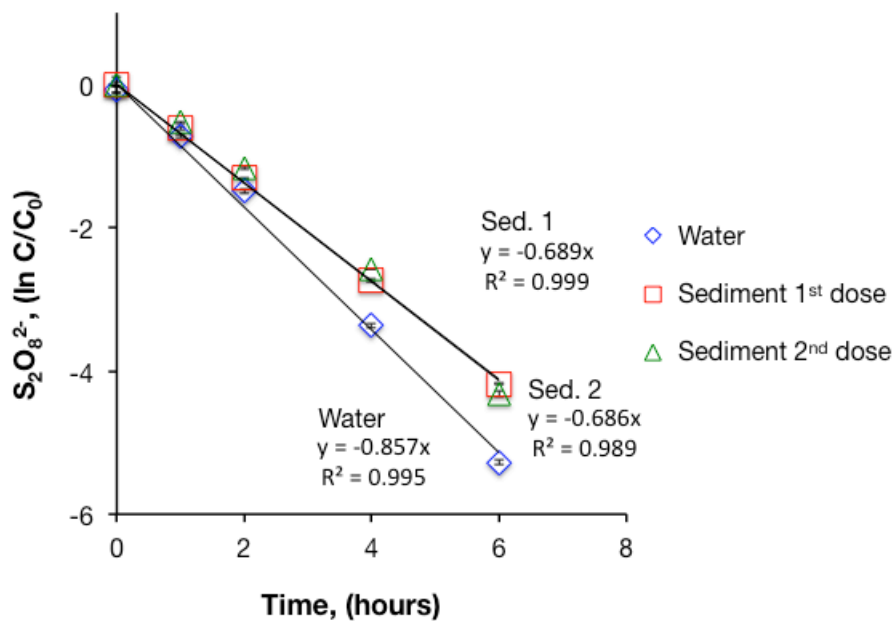

1

2 **Figure S1 [use color].** Persulfate decomposition kinetics.  $[S_2O_8^{2-}]_0 = 50 \text{ mM}$ ,  $[PFOA]_0$   
 3  $= 5 \text{ } \mu\text{M}$ ,  $T = 85^\circ\text{C}$ . “Water” is unbuffered water, “Sediment 1<sup>st</sup> dose” and “Sediment 2<sup>nd</sup>  
 4 dose” are the 1<sup>st</sup> and 2<sup>nd</sup> aliquots of persulfate added to the sediment slurry reactors,  
 5 respectively.

6

1

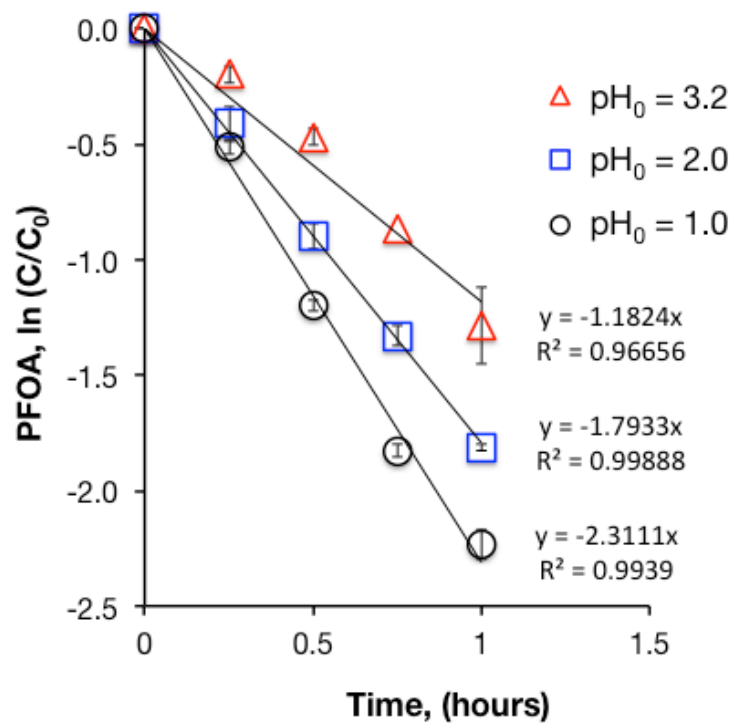

2

3 **Figure S2 [use color].** PFOA removal kinetics in unbuffered water with pH<sub>0</sub> = 1.0, 2.0,  
4 or 3.2. [S<sub>2</sub>O<sub>8</sub><sup>2-</sup>]<sub>0</sub> = 50 mM, [PFOA]<sub>0</sub> = 0.5 μM, T = 85°C.

5

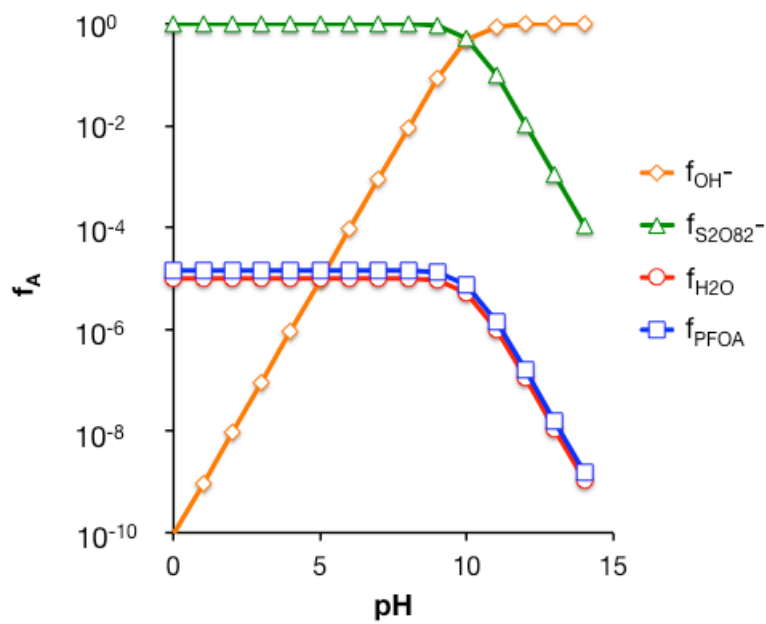

1

2 **Figure S3 [use color].** Analysis of  $\text{SO}_4^{*\ominus}$  fate in reaction systems with different pH.

3  $[\text{PFOA}] = 0.5 \mu\text{M}$ ,  $[\text{S}_2\text{O}_8^{2-}] = 50 \text{ mM}$ .  $f_A$  is the fraction of  $\text{SO}_4^{*\ominus}$  reacting with a given

4 species, A, where A is  $\text{OH}^-$ ,  $\text{H}_2\text{O}$ , PFOA, or  $\text{S}_2\text{O}_8^{2-}$ .

5



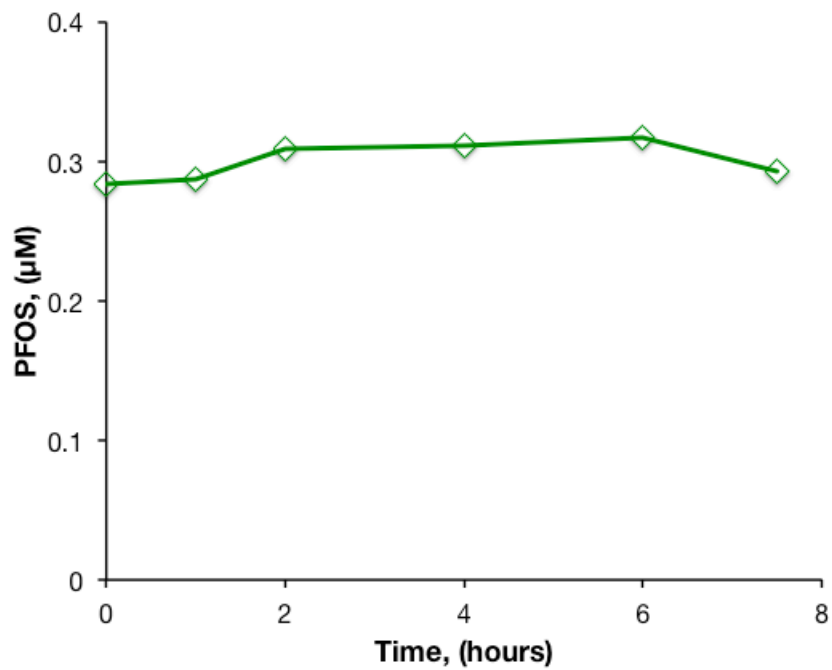

1

2 **Figure S4.** Heat-activated persulfate treatment of PFOS in water.  $[\text{S}_2\text{O}_8^{2-}]_0 = 50 \text{ mM}$ ,  
3 unbuffered,  $T = 85^\circ\text{C}$ .

4

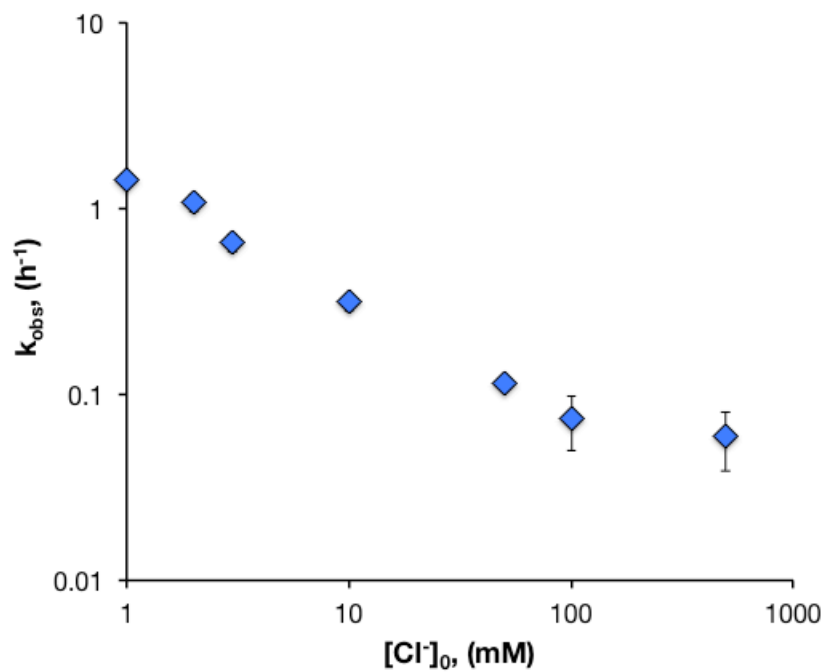

1

2 **Figure S5.** Effect of initial  $\text{Cl}^-$  concentration on observed pseudo-first order rate

3 constants for PFOA loss.  $[\text{S}_2\text{O}_8^{2-}]_0 = 50 \text{ mM}$ ,  $[\text{PFOA}]_0 = 0.5 \text{ }\mu\text{M}$ ,  $T = 85^\circ\text{C}$ ,

4 unbuffered. The observed-first order rate constants ( $k_{\text{obs}}$ ) were obtained by performing a

5 linear regression of data from the first 60 minutes of reaction.

6

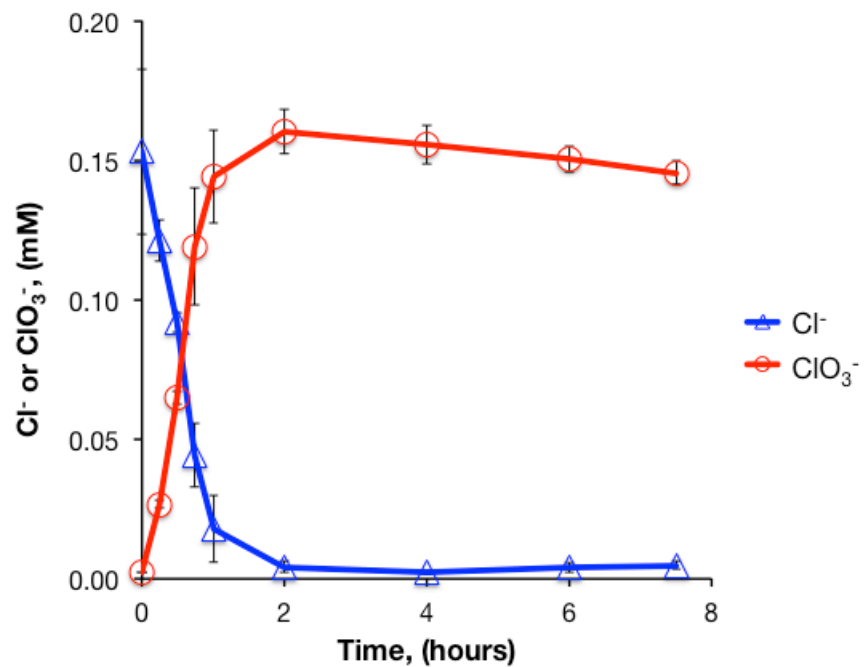

1

2 **Figure S6 [use color].** Loss of  $\text{Cl}^-$  and production of  $\text{ClO}_3^-$  during heat-activated

3 persulfate treatment of PFOA in aquifer sediment slurry. 200 g/L aquifer

4 sediments,  $[\text{S}_2\text{O}_8^{2-}]_0 = 50 \text{ mM}$ ,  $[\text{PFOA}]_0 = 0.5 \text{ }\mu\text{M}$ , unbuffered,  $T = 85^\circ\text{C}$ .

5

6

1

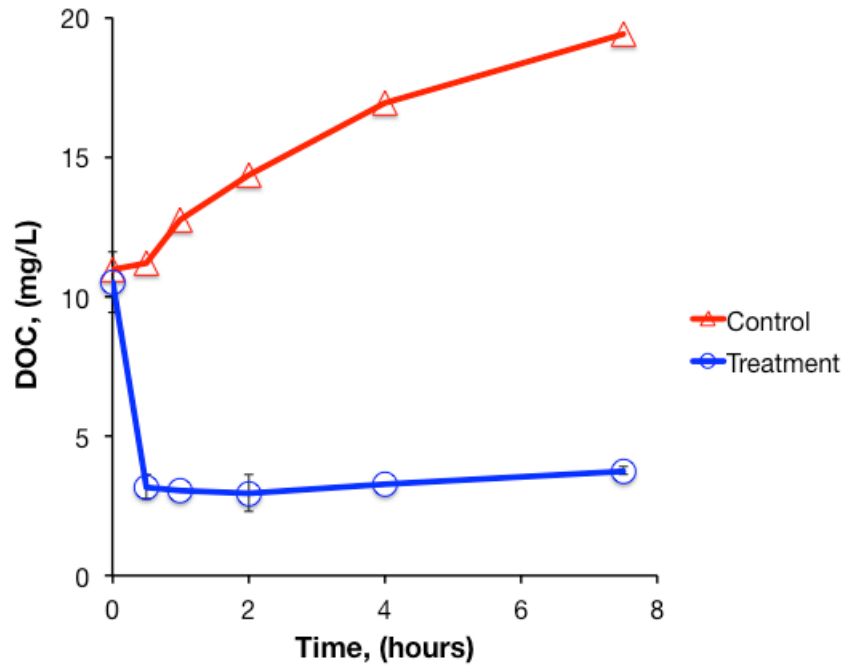

2

3 **Figure S7 [use color].** Dissolved organic carbon concentration during heat-activated  
4 persulfate treatment of PFOA in aquifer sediment slurry. 200 g/L aquifer  
5 sediments,  $[S_2O_8^{2-}]_0 = 50$  mM,  $[PFOA]_0 = 0.5$   $\mu$ M, unbuffered,  $T = 85^\circ\text{C}$ .

6

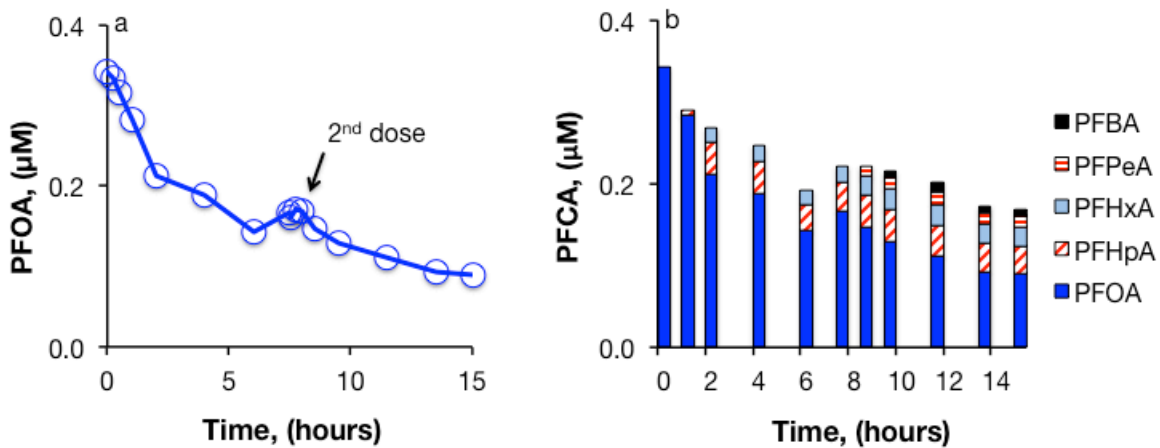

1

2 **Figure S8 [use color].** Heat-activated persulfate treatment of PFOA in surficial soil

3 slurry. (a) PFOA concentration, and (b) PFCA concentrations. 200 g/L soil,  $[S_2O_8^{2-}]_0 =$

4 50 mM x 2,  $[PFOA]_0 = 0.5 \mu\text{M}$ , unbuffered,  $T = 85^\circ\text{C}$ .

5

1   **REFERENCES**

2  
3  
4  
5  
6

1.     Pham, A. L. T.; Doyle, F. M.; Sedlak, D. L., Kinetics and efficiency of H<sub>2</sub>O<sub>2</sub> activation by iron-containing minerals and aquifer materials. *Water Research* **2012**, *46* (19), 6454-6462.
